# Supplementary material for: A copper-controlled RNA interference system for reversible silencing of target genes in Trichoderma reesei
Source: PubMed Central journal article supplement (PMC5806297; doi:10.1186/s13068-018-1038-7), 2018-02-09
Supplement: 13068_2018_1038_MOESM1_ESM.pdf [file 13068_2018_1038_MOESM1_ESM.pdf]

## **Additional file**

**A copper controlled RNA interference system for reversible silencing of target genes in  
*Trichoderma reesei***

Lei Wang, Fanglin Zheng, Weixin Zhang, Yaohua Zhong, Guanjun Chen, Xiangfeng Meng\*,  
Weifeng Liu

No.27 Shanda South Road, State Key Laboratory of Microbial Technology, School of Life  
Science, Shandong University, Jinan 250100, Shandong, P. R. China

Corresponding to Xiangfeng Meng; email: [x.meng@sdu.edu.cn](mailto:x.meng@sdu.edu.cn).

### **Genomic PCR for verifying correct integration event**

The correct integration of RNAi fragment cassette in the chromosome was verified by genomic PCR. We designed four universal primers to amplified two parts of RNAi fragment cassette using primer pairs  $P_{tcul}$ -F(F1)/ $I_{cel5a}$ -R(R1) and  $I_{cel5}$ -F(F2)/ $T_{cel6a}$ -R(R2) (Figure S1). The PCR result showed that two 1000 bp DNA fragments were produced using F1/R1 and F2/R2 primers, respectively, using  $P_{tcul}$ -*pyr4*<sup>KD</sup> strain genome as a template (Figure S2A), which were consistent with expectation (1018 bp and 999 bp, respectively). Likewise, 1070 bp and 1051 bp PCR products were obtained using genome of  $P_{tcul}$ -*xyr1*<sup>KD</sup> strain as a template (Figure S2B), 1187 bp and 1168 bp PCR productions were amplified using genome of  $P_{tcul}$ -*cel7a*<sup>KD</sup> strain as a template (Figure S2C) and 996 bp and 977 bp DNA fragments were produced using genome of  $P_{tcul}$ -*fab1*<sup>KD</sup> strain as a template (Figure S2D).

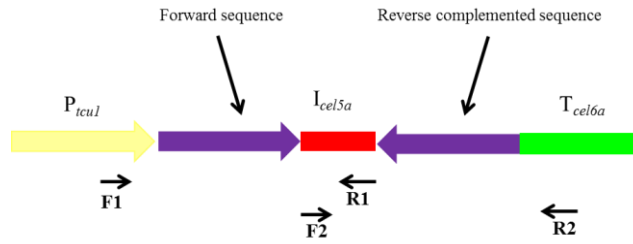

Figure S1 Four universal primers were used for verifying correct integration events of RNAi fragment cassette. The pairs of primers  $P_{tcu1}$ -F(F1)/ $I_{cel5a}$ -R(R1) and  $I_{cel5}$ -F(F2)/ $T_{cel6a}$ -R(R2) were used for verifying forward sequence and reverse complement sequence of RNAi fragment cassette, respectively.

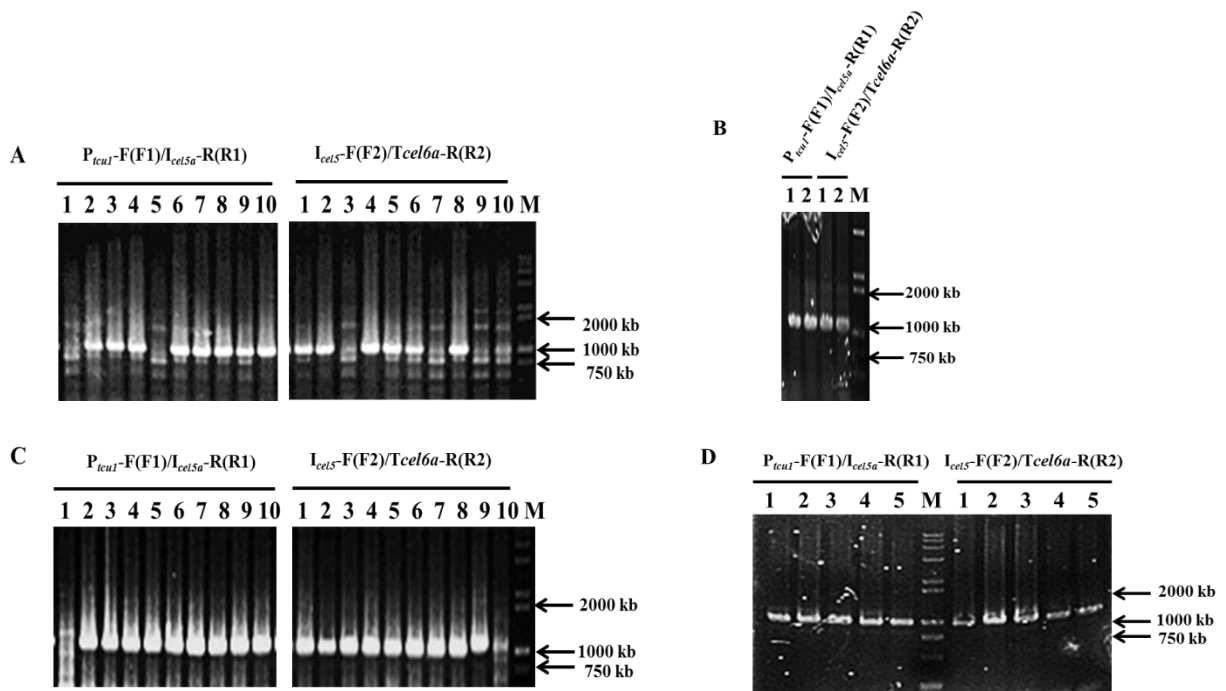

Figure S2 DNA gel electrophoresis of PCR products for verifying correct RNAi transformants.

The PCR was performed by primer pairs  $P_{tcu1}\text{-F(F1)}/I_{cel5a}\text{-R(R1)}$  and  $I_{cel5}\text{-F(F2)}/Tcel6a\text{-R(R2)}$  using genome of  $P_{tcu1}\text{-pyr4}^{\text{KD}}$  (A),  $P_{tcu1}\text{-xyr1}^{\text{KD}}$  (B),  $P_{tcu1}\text{-cel7a}^{\text{KD}}$  (C) and  $P_{tcu1}\text{-fabI}^{\text{KD}}$  (D) as DNA templates.

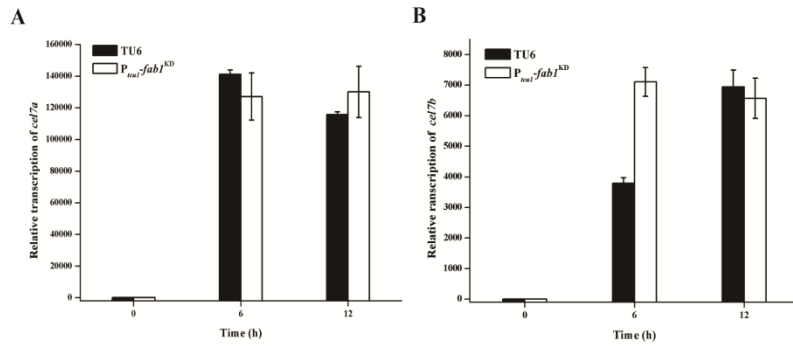

Figure S3 qRT-PCR analysis of the transcription of *cel7a* and *cel7b* in  $P_{tcu1-fabI}^{KD}$  and TU6 strains. The abundance of *cel7a* (A) and *cel7b* (B) mRNAs in  $P_{tcu1-fabI}^{KD}$  and TU6 strains under Avicel inducing condition without copper.

Table S1

Primers used in this study

| Name                        | Sequence (5'-3')                         |
|-----------------------------|------------------------------------------|
| For plasmids construction   |                                          |
| <i>P<sub>icu1</sub></i> -F  | CCCAAGCTTCTGTGTGGCATCACTCAT              |
| <i>P<sub>icu1</sub></i> -R  | CCGGATATCTGTTCGTATCAACCAGGTCG            |
| <i>I<sub>cel5a</sub></i> -F | CCGGATATCATCGGTACCGTGAGTACCCTTGTTTC      |
| <i>I<sub>cel5a</sub></i> -R | GGGCGGCCGCACGACTAGTCTGTAACAAGACTTCCATTAA |
| <i>T<sub>cel6a</sub></i> -F | GGACTAGTGGCTTTCGTGACCGGGCTT              |
| <i>T<sub>cel6a</sub></i> -R | ACGCGTCGACACGAGCTTGTGCTGCGGAATC          |
| <i>cel7a</i> -F1            | CCGGATATCCTTTACCTTATGGCGAGCGA            |
| <i>cel7a</i> -R1            | GGGGTACCGATTCGACCTGAGCAGGG               |
| <i>cel7a</i> -F2            | GGACTAGTGATTCGACCTGAGCAGGG               |
| <i>cel7a</i> -R1            | ATAAGAATGCGGCCGCCTTTACCTTATGGCGAGCGA     |
| <i>xyr1</i> -F1             | CCGATATCTTACCCGCTGGCAAATGG               |
| <i>xyr1</i> -R1             | GGGGTACCTGTTCAAGTCGTGCTCATCC             |
| <i>xyr1</i> -F2             | GGACTAGTTGTTCAAGTCGTGCTCATCC             |
| <i>xyr1</i> -R2             | ATAAGAATAGCGGCCGCTTACCCGCTGGCAAATGG      |
| <i>pyr4</i> -F1             | CCGATATCGTACCTGGCCGACAAGATTG             |
| <i>pyr4</i> -R1             | GGGGTACCGTTGAGCGTCTCCTGCGAGAT            |
| <i>pyr4</i> -F2             | GGACTAGTGTTGAGCGTCTCCTGCGAGAT            |
| <i>pyr4</i> -R2             | ATAAGAATGCGGCCGCTACCTGGCCGACAAGATTG      |

*fab1*-F1 CCGATATCTCTCTTTTCGACAGTCGAGACGT  
*fab1*-R1 GGGGTACCAGATGCCAACAGTTTGGAGCTTGC  
*fab1*-F2 GGACTAGTAGATGCCAACAGTTTGGAGCTTGC  
*fab1*-R2 ATAAGAATAGCGGCCGCTCTCTTTTCGACAGTCGAGACGT

For genomic PCR

*P<sub>1cu1</sub>*-F(F1) CCACAAGAGCCTACTGCCAAATC  
*T<sub>cel6a</sub>*-R(R1) TAGACAAAGACTCCGCCAACC  
*I<sub>cel5a</sub>* F(F2) GTGAGTACCCTTGTTTCCTGGT  
*I<sub>cel5a</sub>*-R(R2) CTGTAACAAGACTTCCATTAATTC

For qRT-PCR

*Qcel7a*-F CTTGGCAACGAGTTCTCTT  
*Qcel7a*-R TGTTGGTGGGATACTTGCT  
*Qxyr1*-F CCATCAACCTTCTAGACGAC  
*Qxyr1*-R AACCTGCAGGAGATAGAC  
*Qcel7b*-F CGGCTACAAAAGCTACTACG  
*Qcel7b*-R CTGGTACTTGCGGGTGAT  
*Qcel3a*-F AGTGACAGCTTCAGCGAG  
*Qcel3a*-R GGAGAGGCGTGAGTAGTTG  
*Q<sub>tcu1</sub>*-F GCTGGTGAAGAAGCAAGGA  
*Q<sub>tcu1</sub>*-R GCATGACTATGTACGCGGCTC  
*Qfab1*-F AGACGCTGGATGATCGGCTCGT  
*Qfab1* -R GAGGGGACTCGTAAATGTACT

---
